# Supplementary material for: Expression of Actin-interacting Protein 1 Suppresses Impaired Chemotaxis of Dictyostelium Cells Lacking the Na+-H+ Exchanger NHE1
Source: PubMed Central journal article supplement — Mol Biol Cell. 2010 Sep 15;21(18):3162–70. doi: 10.1091/mbc.E09-12-1058 (PMC2938382; doi:10.1091/mbc.e09-12-1058), 2010-09-15

## SUPPLEMENTAL FIGURE LEGENDS

**Supplemental Figure 1.** Plaque formation assay reveals partial rescue of the *DdnheI*<sup>-</sup> phenotype by expression of *DdAip1*-FL. Cells were plated together with heat-killed bacteria on PB buffer agar plates and incubated for 2 days. Representative images of plaques are shown. Bar, 1 mm. Ax2 cells formed large plaques whereas *DdnheI*<sup>-</sup> cells formed smaller plaques without aggregates. Expression of *DdAip1*-Δ382 made plaques size of *DdnheI*<sup>-</sup> cells smaller, but expression of *DdAip1*-FL rescue partially plaque size and aggregation defect of *DdnheI*<sup>-</sup> cells.

**Supplemental Figure 2.** Immunoblot analysis reveals comparable expression of *DdAip1* mutants in Ax2 and *DdnheI*<sup>-</sup> cells. (A) Expression of *DdAip1*-Δ382 tagged with a FLAG epitope in Ax2 and *DdnheI*<sup>-</sup> cells, determined with antibodies to FLAG. (B) Expression of full-length *DdAip1* (FL) and *DdAip1*-4X (4X) tagged with GFP in Ax2 and *DdnheI*<sup>-</sup> cells, determined with antibodies to GFP. Immunoblotting for actin was used as a loading control.

**Supplemental Figure 3.** (A) Localization of F-actin, determined by rhodamine-phalloidin staining, was restricted to the leading edge of migrating Ax2 cells but around the cell periphery in *DdnheI*<sup>-</sup> cells. In *DdnheI*<sup>-</sup>/*DdAip1*-FL cells, F-actin was localized at the front and at the lateral edges of migrating cells. (B) Quantitative analysis of F-actin indicates a predominant localization at the leading edge of Ax2 cells but not *DdnheI*<sup>-</sup> or *DdnheI*<sup>-</sup>/*DdAip1*-FL cells. Fluorescence intensity of rhodamine-phalloidin was measured in 20 sectors along the cell perimeter starting and ending at the rear of the cell (-180 and +180, respectively), with 0 degree indicating the cell front oriented toward the cAMP source. Data are for cells shown in A and are representative of more than 80% of chemotaxing cells for each clone.

**Supplemental Figure 4.** Quadruple mutant of Aip1 (Aip1-4X) binds cofilin and F-actin. (A) GST-pull down assay indicates the comparable binding of Aip1-FL (FL) and Aip1-4X (4X) to cofilin in the absence of actin. 0.5  $\mu$ M GST-fusion of Aip1-FL and Aip1-4X was incubated with various concentrations of cofilin. (B) Actin co-sedimentation assay indicates binding of Aip1-4X to F-actin. 10  $\mu$ M of polymerized actin was incubated with 0.5  $\mu$ M of Aip1-4X for 1 h. F-actin was pelleted by ultracentrifugation and proteins in supernatant (S) and the pellet (P) fractions were resolved by SDS-PAGE.

**Supplemental Video Legends:**

**Supplemental Video 1.** Chemotaxis of wild-type Ax2 cells.

**Supplemental Video 2.** Chemotaxis of *DdnheI*<sup>-</sup> cells.

**Supplemental Video 3.** Chemotaxis of Ax2/*DdAip1*- $\Delta$ 382 cells.

**Supplemental Video 4.** Chemotaxis of *DdnheI*<sup>-</sup>/*DdAip1*- $\Delta$ 382 cells.

**Supplemental Video 5.** Chemotaxis of Ax2/*DdAip1*-FL cells.

**Supplemental Video 6.** Chemotaxis of *DdnheI*<sup>-</sup>/*DdAip1*-FL cells.

**Supplemental Video 7.** Submerged development of Ax2 cells.

**Supplemental Video 8.** Submerged development of *DdnheI*<sup>-</sup> cells.

**Supplemental Video 9.** Submerged development of *DdnheI*<sup>-</sup>/*DdAip1*-FL cells.

**Supplemental Video 10.** Submerged development of *DdnheI*<sup>-</sup>/*DdAip1*-4X cells.

# Supplemental Figure 1

**Ax2**

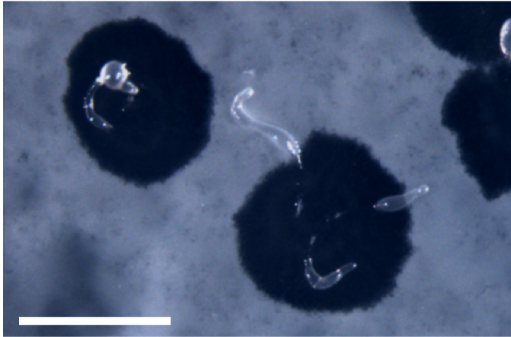

***Ddnhe1*<sup>-</sup>**

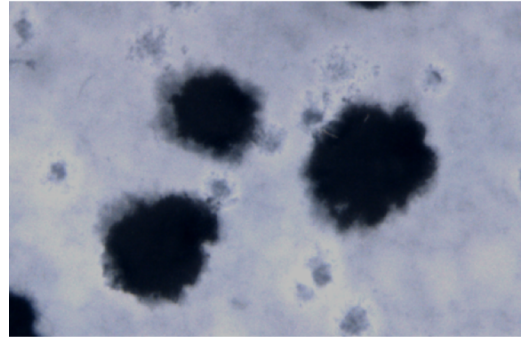

***Ddnhe1*<sup>-</sup>/*Aip1*- $\Delta$ 382**

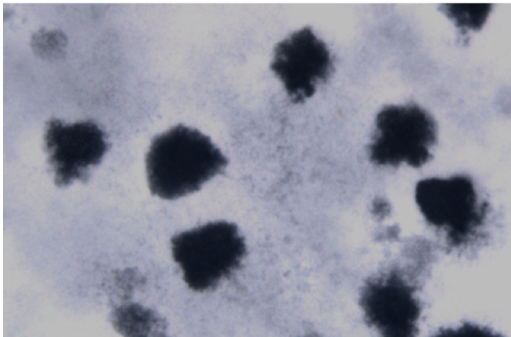

***Ddnhe1*<sup>-</sup>/*Aip1*-FL**

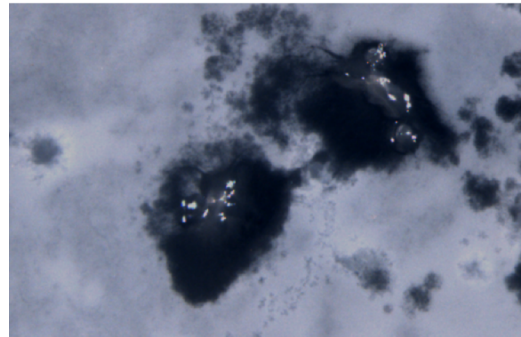

## Supplemental Figure 2

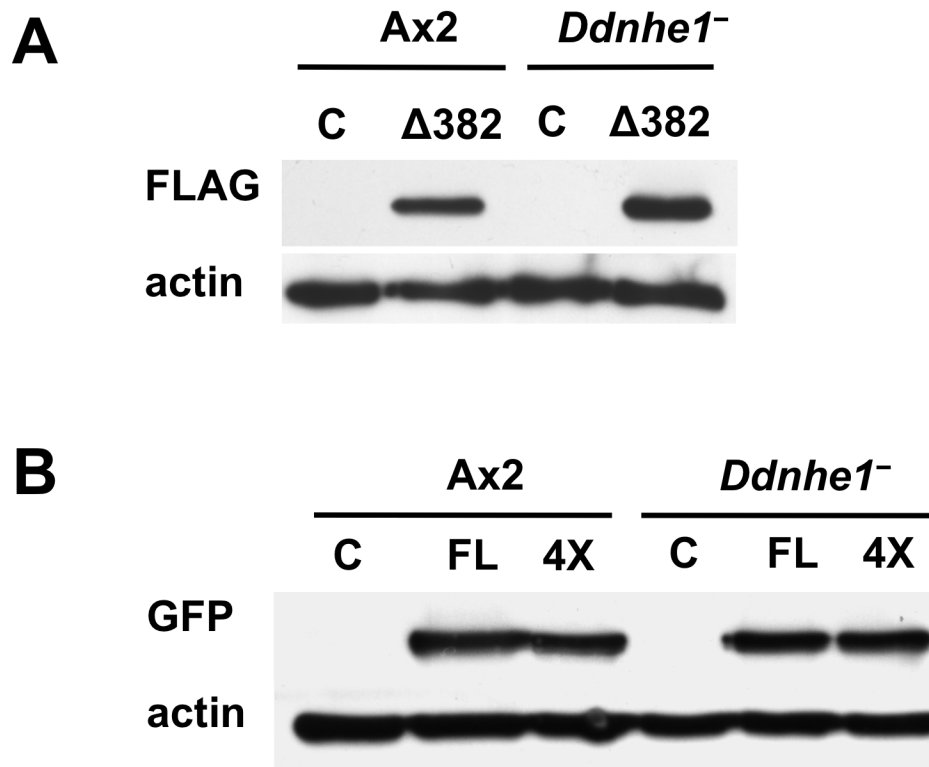

# Supplemental Figure 3

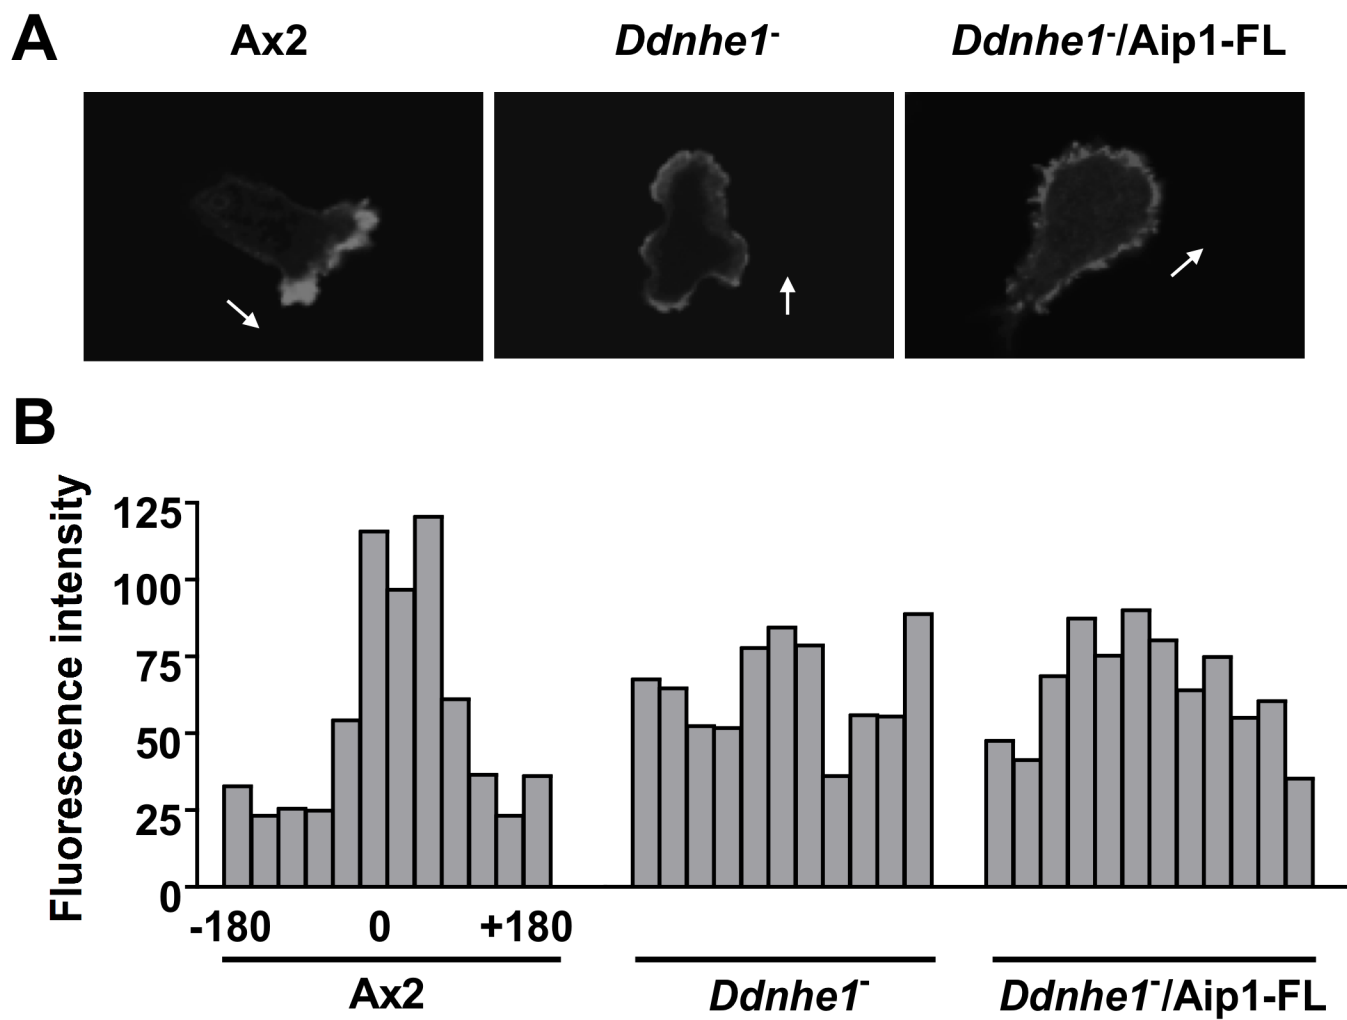

Supplement: E09-12-1058_1.pdf [file E09-12-1058_1.pdf]
